# Supplementary material for: Translation and Adaptation into Hindi of Central Religiosity Scale, Brief Religious Coping Scale (Brief RCOPE), and Duke University Religion Index (DUREL)
Source: PubMed Central journal article supplement — Indian J Psychol Med. 2019 Nov 11;41(6):556–61. doi: 10.4103/IJPSYM.IJPSYM_304_18 (PMC6875839; doi:10.4103/ijpsym.ijpsym_304_18), 2019-11-11
Supplement: IJPsyM-41-556_Suppl1.pdf [file IJPsyM-41-556_Suppl1.pdf]

## Duke University Religion Index (DUREL)

1. आप कितनी बार मंदिर/गुरुद्वारा/चर्च या किसी और धर्म सम्बन्धी सभाओं में जाते हैं ।
  1. कभी नहीं
  2. साल में एक बार या कम
  3. साल में कुछ बार
  4. महीने में कुछ बार
  5. सप्ताह में एक बार
  6. सप्ताह में एक या अधिक बार
2. आप कितने बार निजी/व्यक्तिगत तौर पर धर्म सम्बन्धी कार्यों में - जैसे की प्रार्थना करना, ध्यान लगाना या धार्मिक किताबें (रामायण,ग्रंथसाहिब, कुरान,बाइबल) पढने में समय व्यतीत करते हैं ।
  1. बहुत कम या कभी नहीं
  2. महीने में कुछ बार
  3. सप्ताह में एक बार
  4. सप्ताह में दो या अधिक बार
  5. प्रतिदिन/ रोजाना
  6. हर दिन में एक से अधिक बार

**निम्नलिखित भाग में धार्मिक विश्वास व अनुभव के बारे में तीन विवरण/व्याख्यान/ कथन दिए गए हैं/कृपा अपना जबाब इस बात को ध्यान में रख कर दें कि यह विवरण/व्याख्यान/ कथन किस हद तक आप के लिए सही या गलत हैं /**

3. मैं अपनी जिंदगी में भगवान/दैविक शक्तियों की मौजूदगी का अनुभव करता हूँ ।
  1. निश्चित तौर से गलत
  2. कुछ हद तक सही नहीं है
  3. कुछ कहा नहीं जा सकता
  4. कुछ हद तक सही है
  5. निश्चित तौर से सही
4. मेरा धार्मिक विश्वास जीवन के प्रति मेरे दृष्टिकोण का आधार है ।
  1. निश्चित तौर से गलत
  2. कुछ हद तक सही नहीं है
  3. कुछ कहा नहीं जा सकता
  4. कुछ हद तक सही है
  5. निश्चित तौर से सही
5. मैं अपने जीवन के हर लेन-देन में अपने धर्म को पूरी तरह से ऊपर रखने की कोशिश करता हूँ ।
  1. निश्चित तौर से गलत
  2. कुछ हद तक सही नहीं है
  3. कुछ कहा नहीं जा सकता
  4. कुछ हद तक सही है
  5. निश्चित तौर से सही
